# Supplementary material for: Acupuncture combined with Chinese herbal medicine in the treatment of perimenopausal insomnia: A systematic review and meta-analysis
Source: PubMed Central journal article supplement — Medicine (Baltimore). 2023 Nov 10;102(45):e35942. doi: 10.1097/MD.0000000000035942 (PMC10637479; doi:10.1097/md.0000000000035942), 2023-11-10
Supplement: medi-102-e35942-s001.pdf [file medi-102-e35942-s001.pdf]

CNKI

SU = (' sleep start AND maintain barriers' + 'insomnia' + 'awake' + 'vigil' + 'insomnia' + 'not  
mei) AND SU = (' menopausal transition' + 'menopause' + 'climacteric') AND SU = ('  
acupuncture '+' warm needle '+' acupuncture '+' body acupuncture '+' dry needle '+' earpins'  
+ 'manual acupuncture' + 'cupping' + 'cupping treatment' + 'laser needle) AND SU = ('  
randomized controlled trials' + ' clinical effect '+' experience '+' randomly assigned '+' clinical  
observation '+' analysis' + 'influence')

Wan Fang

Subject =(Sleep initiation AND maintenance disorder OR insomnia OR wakefulness state OR  
vigil OR insomnia OR sleeplessness) AND subject =(Perimenopause OR menopause OR  
menopause) AND subject =(acupuncture OR warm acupuncture OR acupuncture therapy OR  
body acupuncture OR dry acupuncture OR ear acupuncture OR Manual acupuncture OR  
electroacupuncture OR electroacupuncture therapy OR laser acupuncture) AND topic  
=(randomized controlled trial OR clinical effect OR experience OR randomized assignment  
OR clinical observation OR analysis of the effect of OLR)

VIP

U=(sleep initiation AND maintenance disorder + insomnia + wakeful state + vigil + insomnia  
+ sleeplessness) AND U=(perimenopause + menopause + menopause) AND U=(acupuncture  
+ warm acupuncture + acupuncture therapy + body acupuncture + dry acupuncture + ear  
acupuncture + manual acupuncture + electroacupuncture + electroacupuncture + laser  
acupuncture) AND U=(Randomized controlled trial + clinical effect + experience +  
randomized assignment + clinical observation + analysis + impact)

Sinomed

"Sleep initiation and maintenance disorders "[all fields] OR (" insomnia "[all fields] OR" falling  
asleep and sleep disorders "[all fields] OR "falling asleep and sleep disorders "[all fields] OR"  
insomnia "[all fields] OR "falling asleep and sleep disorders "[subject word]) OR (" state of  
wakefulness "[all fields] OR "State of wakefulness "[subject word]) OR" vigil "[all fields] OR ("  
Insomnia "[all fields] OR "fall asleep and sleep disorders "[all fields] OR" fall asleep and sleep  
disorders "[all fields] OR "insomnia "[all fields] OR "To sleep AND sleep disorders [keywords]"  
OR (" insomnia "all [field] OR" insomnia "all [field] OR" insomnia "[keywords])) AND (("   
perimenopausal" all [field] OR "perimenopausal" [keywords]) OR "menopause" all [field] OR  
(" menopause "all [field] OR" life menopause all [field] "OR" menopause "[keywords])) AND ("   
acupuncture" all [field] OR "wen needle" all [field] OR (" acupuncture "all [field] OR"  
acupuncture "[keywords]) OR "Body acupuncture "[all fields] OR" dry acupuncture "[all fields]  
OR (" ear acupuncture "[all fields] OR "ear acupuncture "[all fields] OR" auricular acupuncture  
"[all fields] OR "auricular acupuncture "[all fields] OR" auricular acupuncture "[All fields] OR  
"auricular acupuncture "[All fields] or" auricular acupuncture "[All fields] or "acupuncture, Ear  
"[keywords]) OR" manual acupuncture "all [field] OR (" cupping" all [field] OR "cupping"  
[keywords]) OR "cupping treatment" all [field] OR "laser needle" all [field]) AND ((" a  
randomized controlled trial "all [field] OR "Randomized controlled trial "[subject word]) OR"  
clinical effect "[all fields] OR "experience "[all fields] OR (" randomized assignment "[all fields]

OR" randomized assignment "[subject word]) OR "clinical observation "[all fields] OR "Analysis  
 "[all fields] OR" Impact "[All fields])

**PUBMED**

| Search number | Query                                                                                                                                                                                              | Results   |
|---------------|----------------------------------------------------------------------------------------------------------------------------------------------------------------------------------------------------|-----------|
| 8             | #3 AND #6 AND #7                                                                                                                                                                                   | 43        |
| 7             | (((((((Acupuncture Therapy) ) OR (body acupuncture)) OR (manual acupuncture)) OR (Electroacupuncture)) OR (electro-acupuncture)) OR (Acupuncture, Ear)) OR (laser acupuncture)) OR (warm needling) | 37,300    |
| 6             | #4 AND #5                                                                                                                                                                                          | 1,781     |
| 5             | ((Perimenopause) OR (Menopause)) OR (Climacteric)                                                                                                                                                  | 99,809    |
| 4             | (((sleep disorder) OR (losesleep)) OR (Wakefulness)) OR (agrypnia)) OR (ahypnosis)) OR (insomnia)                                                                                                  | 168,669   |
| 3             | #1 AND #2                                                                                                                                                                                          | 1,978,216 |
| 2             | humans                                                                                                                                                                                             | #####     |
| 1             | ((((((Randomized Controlled Tria) OR (Controlled Clinical Trial)) OR (Random Allocation)) OR (Placebos)) OR (Clinical Trial)) OR (randomly)) OR (trial)                                            | 2,421,429 |

**Cochrane**

Date Run: 04/09/2023 10:48:46

Comment:

| ID  | Search                                                                          | Hits    |
|-----|---------------------------------------------------------------------------------|---------|
| #1  | MeSH descriptor: [Randomized Controlled Trial] explode all trees                | 25733   |
| #2  | MeSH descriptor: [Controlled Clinical Trial] explode all trees                  | 38478   |
| #3  | MeSH descriptor: [Random Allocation] explode all trees                          | 23366   |
| #4  | MeSH descriptor: [Placebos] explode all trees                                   | 25639   |
| #5  | MeSH descriptor: [Clinical Trial] explode all trees                             | 45348   |
| #6  | randomly                                                                        | 315984  |
| #7  | trial                                                                           | 1367515 |
| #8  | #1 or #2 or #3 or #4 or #5 or #6 or #7                                          | 1486933 |
| #9  | humans                                                                          | 784305  |
| #10 | #8 and #9                                                                       | 529231  |
| #11 | MeSH descriptor: [Sleep Initiation and Maintenance Disorders] explode all trees | 3320    |
| #12 | losesleep                                                                       | 0       |
| #13 | MeSH descriptor: [Wakefulness] explode all trees                                | 1478    |
| #14 | agrypnia                                                                        | 9       |
| #15 | ahypnosis                                                                       | 1       |
| #16 | insomnia                                                                        | 14613   |
| #17 | #11 or #12 or #13 or #14 or #15 or #16                                          | 16500   |
| #18 | MeSH descriptor: [Perimenopause] explode all trees                              | 196     |

#19 MeSH descriptor: [Menopause] explode all trees 9611  
#20 MeSH descriptor: [Climacteric] explode all trees 9855  
#21 #18 or #19 or #20 9855  
#22 MeSH descriptor: [Acupuncture Therapy] explode all trees 6467  
#23 body acupuncture 2080  
#24 manual acupuncture 1012  
#25 MeSH descriptor: [Electroacupuncture] explode all trees 1161  
#26 electro-acupuncture 783  
#27 MeSH descriptor: [Acupuncture, Ear] explode all trees 244  
#28 laser acupuncture 870  
#29 warm needling 138  
#30 #22 or #23 or #24 or #25 or #26 or #27 or #28 or #29 9406  
#31 #10 and #17 and #21 and #30 20
